# Supplementary material for: Isolated systolic hypertension and insulin resistance assessment tools in young and middle-aged Chinese men with normal fasting glucose: a cross-sectional study
Source: PubMed Central journal article supplement (PMC8760306; doi:10.1038/s41598-021-04763-x), 2022-01-14

Young men

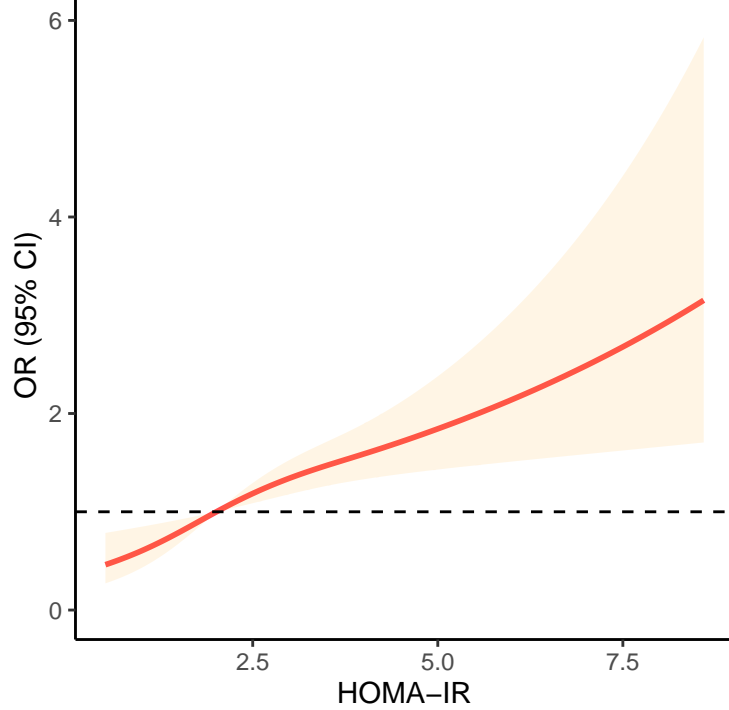

Young men

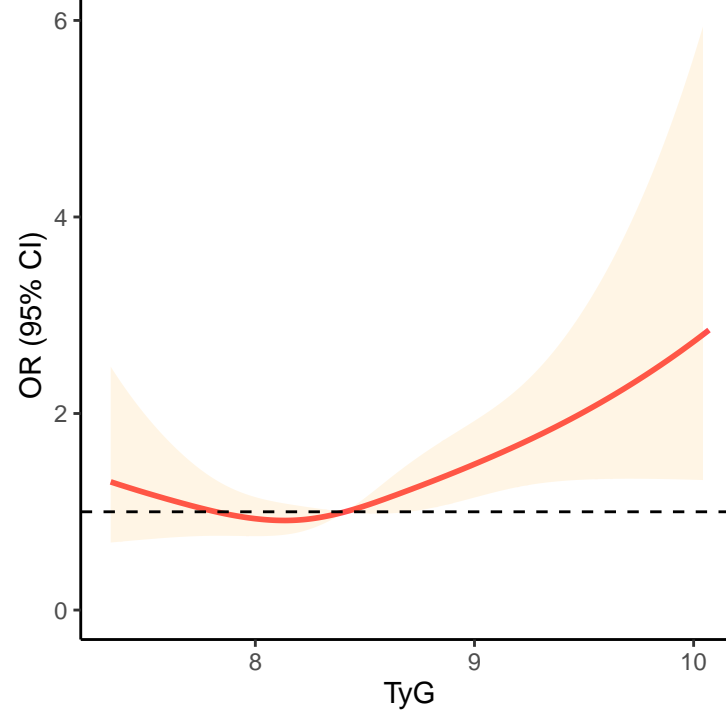

Young men

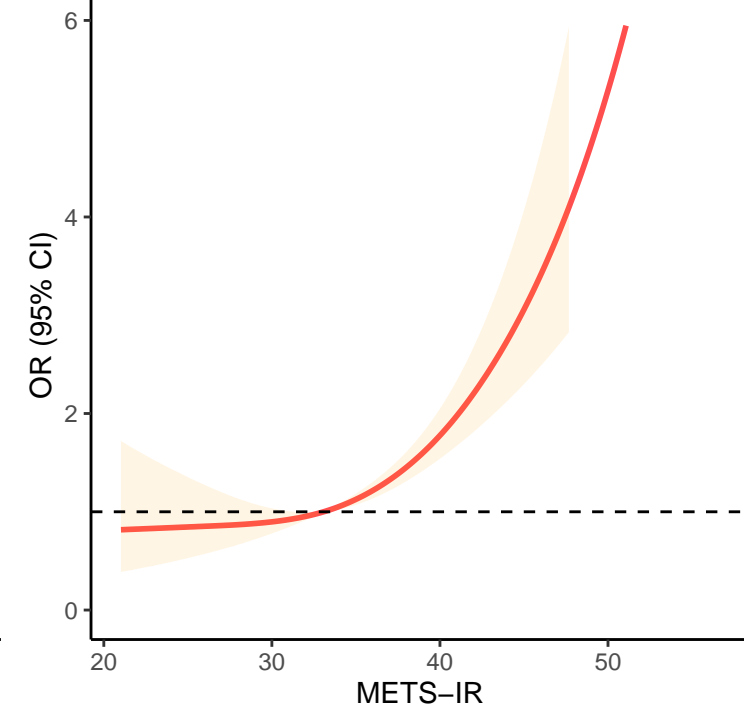

Middle-aged men

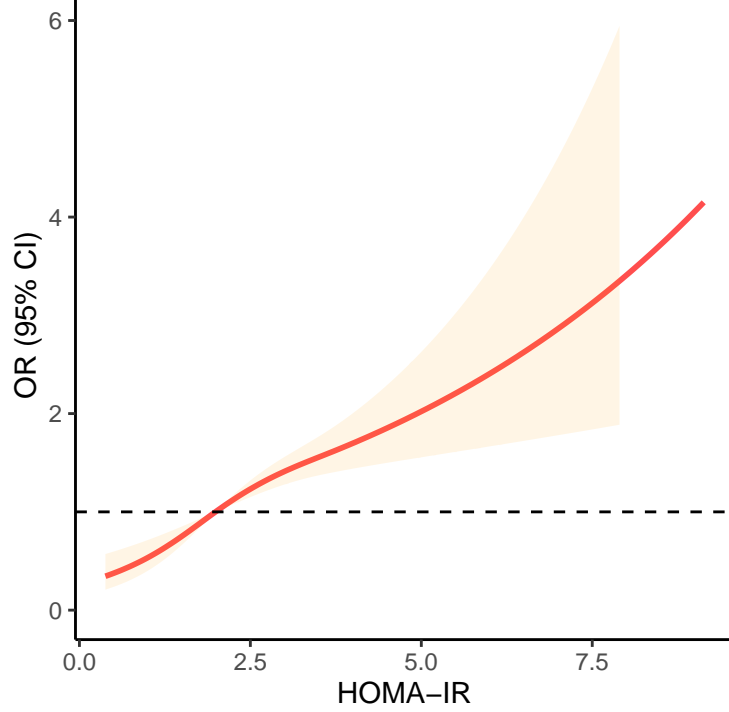

Middle-aged men

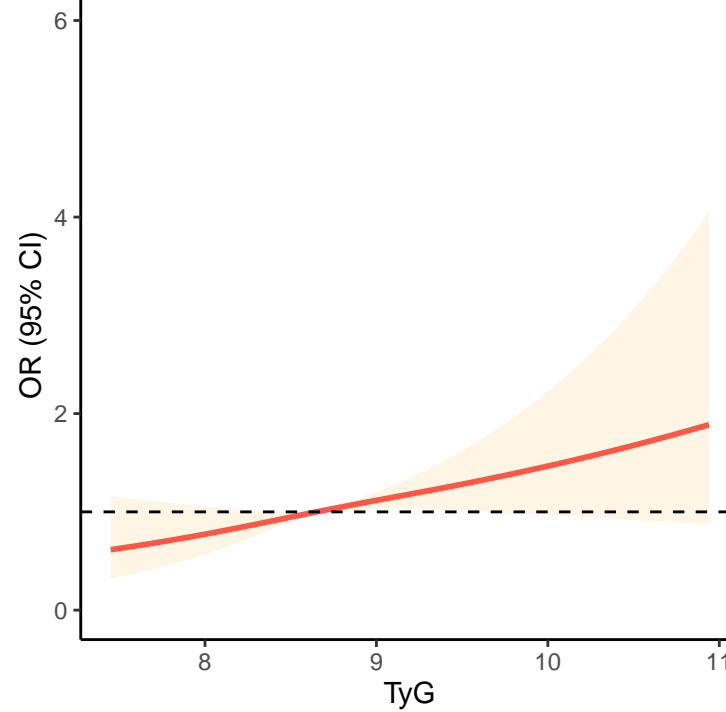

Middle-aged men

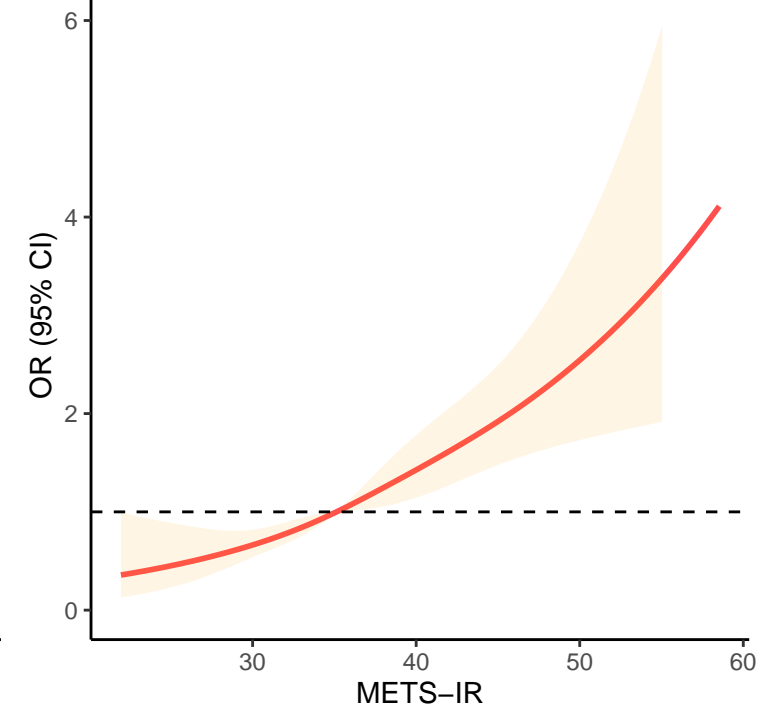

Supplement: 41598_2021_4763_MOESM1_ESM.pdf [file 41598_2021_4763_MOESM1_ESM.pdf]
